# 1 Temporal Effects of Galactose and Manganese Supplementation on Monoclonal Antibody N-Linked Glycosylation 2 in Fed-Batch and Perfusion Bioreactor Operation

3 Aron Gyorgypal<sup>1,2</sup>, Erica Fratz-Berilla<sup>2</sup>, Casey Kohnhorst<sup>2</sup>, David N. Powers<sup>2</sup>, Shishir P. S. Chundawat<sup>1</sup>

4  
5 <sup>1</sup>Department of Chemical and Biochemical Engineering, Rutgers The State University of New Jersey, Piscataway, NJ,  
6 United States

7 <sup>2</sup>Center for Drug Evaluation and Research, Office of Product Quality, Office of Biotechnology Products, Division of  
8 Biotechnology Review and Research II, US Food and Drug Administration (FDA), Silver Spring, MD, United States  
9

10 **\*Corresponding Author:** Shishir P. S. Chundawat ([shishir.chundawat@rutgers.edu](mailto:shishir.chundawat@rutgers.edu))

11  
12 **Keywords:** Bioprocessing, Monoclonal Antibody, Perfusion, N-Linked Glycosylation

## 13 **Abstract**

14 Monoclonal antibodies (mAbs) represent a majority of biotherapeutics on the market today. These glycoproteins  
15 undergo post-translational modifications, such as N-linked glycosylation, that influence the structural & functional  
16 characteristics of the antibody. Glycosylation is a heterogenous post-translational modification that may influence  
17 therapeutic glycoprotein stability and clinical efficacy, which is why it is often considered a critical quality attribute  
18 (CQA) of the mAb product. While much is known about the glycosylation pathways of Chinese Hamster Ovary (CHO)  
19 cells and how cell culture chemical modifiers may influence the N-glycosylation profile of the final product, this  
20 knowledge is often based on the final cumulative glycan profile at the end of the batch process. Building a temporal  
21 understanding of N-glycosylation and how mAb glycoform composition responds to real-time changes in the  
22 biomanufacturing process will help build integrated process models that may allow for glycosylation control to  
23 produce a more homogenous product. Here, we look at the effect of specific nutrient feed media additives (e.g.,  
24 galactose, manganese) and feeding times on the N-glycosylation pathway to modulate N-glycosylation of a Herceptin  
25 biosimilar mAb (i.e., Trastuzumab). We deploy the N-GLYcanalyzer process analytical technology (PAT) to monitor  
26 glycoforms in near real-time for bench-scale bioprocesses operated in both fed-batch and perfusion modes to build  
27 an understanding of how temporal changes in mAb N-glycosylation are dependent on specific media additives. We  
28 find that Trastuzumab terminal galactosylation is sensitive to media feeding times and intracellular nucleotide sugar  
29 pools. Temporal analysis reveals an increased desirable production of single and double galactose-occupied  
30 glycoforms over time under glucose-starved fed-batch cultures. Comparable galactosylation profiles were also  
31 observed between fed-batch (nutrient-limited) and perfusion (non-nutrient-limited) bioprocess conditions. In  
32 summary, our results demonstrate the utility of real-time monitoring of mAb glycoforms and feeding critical cell  
33 culture nutrients under fed-batch and perfusion bioprocessing conditions to produce higher-quality biologics.

## 34 **Introduction**

35 Monoclonal antibodies (mAbs) produced from Chinese hamster ovary (CHO) cells represent a majority of  
36 biotherapeutics on the market today and continually exhibit steady annual growth rates. In addition to the approval  
37 of new innovators entering the market every year, there has been a rise within the biosimilar market as patent  
38 protections expire for older mAb products.<sup>1,2</sup> The ability of CHO cells to produce humanized or human-like post-  
39 translational modifications, such as N-linked glycosylation, makes them highly desirable as an expression system for  
40 producing mAb products.

41 N-linked glycosylation is a common post-translational modification where specific oligosaccharides (i.e., N-glycans)  
42 are attached to an asparagine residue on the protein backbone of the Fc region of the mAb. The N-glycans attached  
43 to antibodies are known to influence their clinical efficacy, such as stability, pharmacodynamics, and

44 pharmacokinetics.<sup>3,4</sup> The biosynthesis of glycoproteins in mammalian cells involves a complex and interconnected  
45 network of glycosylation enzymes within the secretory compartments of the endoplasmic reticulum (ER) and the  
46 Golgi apparatus. The glycosylation pathway is also sensitive to cellular metabolism, thus producing heterogeneous  
47 glycosylation of the secreted mAb product. Perturbations during bioprocessing (i.e., changes in the dissolved oxygen  
48 (DO) levels, pH, temperature, and agitation rates) can influence the pathways as well, influencing the final glycan  
49 profile, often making it important to identify the critical process parameters (CPP) and critical material attributes  
50 (CMA) during upstream bioprocessing that can influence final drug CQAs like N-glycosylation.<sup>5-9</sup>

51 The N-glycans attached to a mAb protein can often be characterized or differentiated by its terminal sugars, which  
52 influence final drug clinical characteristics. For example, afucosylated mAbs have been reported to have improved  
53 binding to the FcγRIII receptor as a consequence of the absence of the molecule, increasing accessibility for  
54 interaction and thus increasing Fc-mediated antibody-dependent cellular cytotoxicity (ADCC).<sup>10,11</sup> Terminal galactose  
55 branching enhances complement-dependent cytotoxicity (CDC) by increasing its binding activity to C1q over its non-  
56 galactosylated counterparts.<sup>12</sup> Terminal sialic acids have been demonstrated to increase serum persistence and  
57 modulate anti-inflammatory activity.<sup>13,14</sup> High mannose isoforms can potentially bind to serum mannose-binding  
58 lectin 2 and activate the lectin complement pathway on mAb-targeted cells, increasing their clearance *in-vivo*.<sup>15,16</sup>  
59 Because the varying glycoforms can significantly impact the clinical efficacy of the mAb product, N-linked  
60 glycosylation is typically considered a CQA and needs to be closely monitored during bioprocessing.

61 Glycosylation profiles of the secreted mAb product can be altered using nutrient media feed additives that influence  
62 specific metabolic pathways inside CHO cells. Modulating galactosylation profile of mAbs using feed additives that  
63 impact glycan precursor levels in cells has been previously studied.<sup>17-22</sup> Galactose (gal) and uridine are precursor  
64 molecules to produce Uridine diphosphate galactose (UDP-gal), the substrate for galactosyltransferase enzyme  
65 involved in the biosynthesis pathway. Manganese is a limiting cofactor necessary for this enzymatic reaction as well.  
66 Gramer et al. studied the effects of feeding uridine, manganese, and galactose at different bolus concentrations and  
67 observed a dose-dependent increase in the rate of mAb galactosylation that eventually reached saturation.<sup>21</sup> A  
68 similar study by Kildegaard et al. observed that a 20 mM bolus galactose feed alone was enough to have a statistically  
69 significant impact on mAb galactosylation.<sup>22</sup> Lastly, Sha et al. found that a galactose feed in lieu of glucose can  
70 increase the galactosylation rate of the mAb, which is influenced by an increase in the nucleotide sugar precursor  
71 UDP-gal concentrations within the cells.<sup>19</sup> Other studies have also examined the influence of sialylation as a function  
72 of increased galactosylation<sup>17</sup> or a combination of galactose with lactate on cell metabolism in relationship to mAb  
73 glycosylation. However, the influence of increasing terminal galactose glycan species did not increase the rate of  
74 sialylation as sialyltransferases often become a bottleneck in further modification of N-glycans.<sup>18</sup>

75 Other chemical modulators that do not directly feed into the glycosylation pathway have also been studied to  
76 understand their effects on mAb glycosylation.<sup>23</sup> Sodium butyrate, a histone deacetylase inhibitor known to increase  
77 cell-specific monoclonal antibody production, has been widely studied, and an inverse relationship was found  
78 between cell-specific productivity and glycan maturation.<sup>20</sup> More recently, rosmarinic acid has also been studied and  
79 shown to increase mAb titer favorably; however, no literature shows its effect on glycosylation.<sup>24,25</sup>

80 The temporal influence of nutrient feed addition during the cell culture process on the N-glycosylation process is still  
81 not fully understood for both fed-batch and continuous perfusion processes. This knowledge gap can be attributed  
82 to the lack of integrated process analytical technology (PAT) to allow real-time N-glycosylation analysis to monitor  
83 this critical quality attribute (CQA).<sup>26,27</sup> We have recently showcased the N-GLYcanyzer PAT system that allows for  
84 near-real-time N-glycosylation analysis to fill this gap in process knowledge. Here, we look to first study the influence  
85 of the feeding regimen and the addition of galactose and manganese feed additives on the CHO cell process and N-  
86 glycosylation profile for a model mAb (Trastuzumab). Our experimental design incorporated fed-batch and perfusion  
87 bioreactor-based cell cultures with or without galactose/manganese supplementation to explore the impact of  
88 galactose availability on mAb glycosylation profiles (**Scheme 1**). We look to build an understanding of systematic

89 glucose depletion and daily or alternative day intermittent refeeding with glucose/galactose/Mn nutrients in fed-  
90 batch mode operation and its effect on mAb N-glycosylation. With this knowledge, we next used the N-GLYcanalyzer  
91 system during perfusion-mode bioreactor operation to also study the temporal changes in N-glycosylation profiles  
92 for the monoclonal antibody produced and its response to continuous glucose/galactose/Mn nutrient feeding.

## 93 **Materials and Methods**

94 **Cell Line and Pre-inoculum:** The Chinese hamster ovary (CHO-K1) cell line producing a recombinant mAb biosimilar  
95 of Trastuzumab was kindly donated by GenScript Biotech Corporation (Piscataway, NJ). A seed train was started by  
96 thawing one ampule of cells ( $1 \times 10^7$  cells/mL) from the working seed bank into high-intensity perfusion CHO (HIP-  
97 CHO) medium (Thermo Fischer Scientific, Waltham, MA) containing 0.1% anticlumping agent (Thermo Fischer  
98 Scientific, Waltham, MA) in a 125 mL unbaffled shake flask (VWR, Radnor, PA, USA) with a 40 mL working volume.  
99 All bioreactor experiments were also conducted using this medium. The cells were grown at 37°C, 130 RPM, and 8%  
100 CO<sub>2</sub> in a INFORS HT Multitron Incubator (Infors AG, Bottmingen, Switzerland) for 4 days and passaged twice to  
101  $0.5 \times 10^6$  cells/mL into a 250 mL shake flask and then into a 500 mL shake flask, and then grown for 4 days before  
102 inoculation into the bioreactors for each experiment.

103 **Fed-Batch Bioreactor Culture:** The fed-batch bioreactor culture experiments were run using an AMBR250 modular  
104 bioreactor (Sartorius Stedim North America, Bohemia, NY) with a starting volume of 200 mL. Temperature and pH  
105 control was set the day prior to inoculation to 37 °C and 7.1, respectively. The pH was controlled with bolus additions  
106 of 0.5 M NaOH and sparging of CO<sub>2</sub>. Dissolved oxygen (DO) was controlled at a setpoint of 50% using an O<sub>2</sub> sparge  
107 as needed during the culture. The glucose or glucose/galactose feeds were prepared in HIP CHO Medium at a  
108 concentration of 250 g/L glucose or 250 g/L glucose and 75 g/L galactose. Feeding took place every 24 hours (daily)  
109 or 48 hours (alternative days) starting either day 3 or when the glucose concentration fell below 3 g/L, whichever  
110 came first. The galactose-supplemented cultures were also spiked to 1 μM manganese effective concentration using  
111 manganese chloride during the first feeding day to augment the glycosylation further, as manganese acts as a  
112 cofactor for galactosylation.

113 Cultures were fed to 5 g/L glucose effective concentration at specified intervals. A 3% (v/v) Antifoam C Emulsion  
114 solution (Sigma-Aldrich, St. Louis, MO) was added manually as needed. The bioreactors were inoculated to an initial  
115 density of  $0.5 \times 10^6$  cells/mL. Daily samples were taken to analyze various culture parameters (e.g., glucose, lactate,  
116 glutamate, glutamine, Na<sup>+</sup>, K<sup>+</sup>, and Ca<sup>2+</sup>) on a BioProfile FLEX2 Analyzer (Nova Biomedical, Waltham, MA). Galactose  
117 concentrations were measured using a colorimetric galactose assay kit (ka1669, Abnova, Taipei City, Taipei, Taiwan).  
118 The FLEX2 Analyzer was also tested for galactose interference when measuring glucose. Although galactose presence  
119 did increase the glucose reading at high concentrations (above 4.0 g/L galactose), it had no meaningful impact at the  
120 lower concentrations under 2 g/L. As our study looked at galactose concentrations at or below 1.8 g/L, there was no  
121 meaningful skew in the glucose presence for these studies.

122 Titer analysis of spent medium was analyzed offline daily by Protein A chromatography on an Agilent Bioinert 1260  
123 HPLC system using a Bio-Monolith Recombinant Protein A column (Agilent Technologies, Santa Clara, CA) as well as  
124 with the BLItz biolayer interferometer system (ForteBio, Fremont, CA) using a Protein A biosensor (ForteBio,  
125 Fremont, CA).

126 **Perfusion Bioreactor Culture:** The perfusion cell culture experiments were conducted in a 5 L glass bioreactor using  
127 a Biostat B-DCU controller (Sartorius, Göttingen, Germany) with a working volume of 2 L. Temperature and pH  
128 control was initiated before inoculation to 37 °C and 7.1, respectively. Dissolved oxygen was controlled to a setpoint  
129 of 50%. The pH was controlled by either sparging CO<sub>2</sub> or bolus additions of 0.5 M NaOH (Sigma Aldrich, St. Louis,  
130 MO). The bioreactor was inoculated to an initial density of  $0.5 \times 10^6$  cells/mL. An XCell™ ATF 2 stainless steel device  
131 (Repligen, Waltham, MA) with a 0.2 μm hollow filter fiber cartridge (Repligen, Waltham, MA) controlled by an XCell  
132 C24 Controller (Repligen, Waltham, MA) was used for steady-state perfusion, slowly ramping up the exchange rate

133 from 0.25 to 1.0 vessel volumes a day (VVD) between days 4 and 8. The culture was then maintained at 1 VVD  
134 thereafter until harvest day. The bleed rate was adjusted proportionally with the permeate rate to maintain a  
135 constant VVD and viable cell density (VCD) throughout the culture duration. Offline samples were taken daily to  
136 analyze various culture parameters as described above. Titer and glycans were analyzed at-line daily using the N-  
137 GLYcanyzer PAT system as previously described.<sup>28</sup>

138 **N-Glycosylation Analysis:** Offline N-glycan analysis was done using AdvanceBio Gly-X N-glycan prep with InstantPC  
139 (GX96-IPC, Agilent Technologies, Santa Clara, CA) following the manufacturer's instructions. Briefly, spent media was  
140 removed from the bioreactor daily and then purified using a Protein A HP SpinTrap (Cytiva, Marlborough, MA) with  
141 20 mM phosphate buffer pH 7.2 as a binding buffer and 0.1% formic acid as the eluent. The sample was then  
142 neutralized using 1 M HEPES solution pH 8.0 before buffer exchange into 50 mM HEPES solution pH 7.9 and then  
143 concentrated to ~ 2 g/L using a 10 kDa MWCO spin column (VWR, Radnor, PA). After, 2 mL of Gly-X denaturant was  
144 added to 20 mL of the sample before heating to 90 °C for 3 min. After cooling, 2 mL of N-Glycanase working solution  
145 (1:1 Gly-X N-Glycanase:Gly-X Digest Buffer) was added, mixed, and incubated at 50 °C for 5 min. Afterward, 5 mL of  
146 Instant PC Dye solution was added, mixed, and incubated for an additional 1 min at 50 °C. The sample was diluted  
147 with 150 mL of load/wash solution (2.5% formic acid, 97.5% acetonitrile (ACN)). Then, 400 mL of load/wash solution  
148 was added to the Gly-X Cleanup Plate along with the ~ 172 mL of sample. A vacuum was applied (<5 inHg) until the  
149 sample passed through. Samples were washed twice with 600 mL of Load/Wash solution before being eluted into a  
150 collection plate with 100 mL of Gly-X InstantPC Eluent with vacuum (<2 in Hg). The at-line sample preparation for  
151 perfusion follows the same scheme and is described in detail in an earlier publication.<sup>29</sup>

152 These samples were run on a 1260 Infinity II Bio-Inert LC System (Agilent Technologies, Santa Clara, CA) using an  
153 AdvanceBio Glycan Mapping column 2.1 X 150 mm 2.7 micron (Agilent Technologies, Santa Clara, CA). Mobile phase  
154 A was 50 mM ammonium formate adjusted to pH 4.4 using formic acid and mobile phase B was ACN. The flow rate  
155 was set to 0.5 mL/min, the FLD was set to ex. 285 nm/ em. 345 nm, and the column temperature was set to 55 °C.  
156 The initial eluent was held at 80% B for 2 mins, then dropped immediately to 75% B. From 2 to 30 mins the eluent  
157 was changed from 75% B down to 67% B in a linear gradient, and then from 30 to 31 mins, it was decreased from  
158 67% B down to 40% B. From 31 to 33.5 minutes, the ACN concentration was brought back to 80% at which level it  
159 was held until the end of the run at 45 mins.

160 Relative estimation of glycan fractions was done on OpenLab CDS v3.5 (Agilent Technologies, Santa Clara, CA).  
161 Relative accumulated abundances were calculated by integrating each glycan peak under its respective curve. Each  
162 glycoform was then calculated by dividing the respective glycan peak area by the total peak area. Accumulated  
163 galactosylation Index (GI) was calculated by the summation of all galactose forms from all abundant glycoforms.  
164 Accumulated Mannosylation Index (MI) was measured similarly to galactosylation index but by summing the  
165 abundance of all mannosylated glycoforms. The daily temporal changes in each glycoform were calculated by  
166 calculating the change in mAb titer and relative abundances required between time points to reach the glycan  
167 fraction for the next time point (day).

168 **Amino Acid Preparation and Analysis:** Extracellular amino acids were measured using an Agilent AdvanceBio Amino  
169 Acid reagent kit and a 3 mm I.D. AdvanceBio AAA C18 column following the manufacturer's instructions. Briefly, 200  
170 µL of supernatant from each daily bioreactor sample was taken and placed onto the HPLC multi-sampler in a vial.  
171 The multisampler needle individually prepared samples prior to injection. First, 2.5 µL of borate buffer was aspirated  
172 from a vial, followed by 1 µL of the sample, and the two were mixed before waiting 12 s. Afterward 0.5 µL of ortho-  
173 phthalaldehyde (OPA) was aspirated from a vial and mixed before aspirating 0.4 µL of Fluorenylmethyloxycarbonyl  
174 chloride (FMOC) from a vial and the two were mixed. Then the sample was diluted by aspirating and mixing 32 µL of  
175 injection diluent (0.4% concentrated H<sub>3</sub>PO<sub>4</sub> in mobile phase A). The complete sample is then injected for analysis.  
176 Detection was done using a DAD system using two signals: Signal A at 338 nm, reference wavelength 390 nm for  
177 OPA-derived amino acids and Signal B at 262 nm with reference wavelength at 324 nm for FMOC-derived amino

178 acids. Mobile Phase A was 10 mM Na<sub>2</sub>HPO<sub>4</sub>, 10 mM Na<sub>2</sub>B<sub>4</sub>O<sub>7</sub> pH 8.2, and mobile phase B was 45:45:10, v:v:v  
179 ACN:methanol:water. The column was set to 40 °C and a flow rate of 0.6 mL/min.

180 **Nucleotides Sugar Extraction and Analysis:** The intracellular nucleotide sugars were extracted from CHO Cells  
181 following a method by Sha et al.<sup>30</sup> Briefly, a volume of 3 million cells was collected and centrifuged at 1000 RPM for  
182 5 minutes. The supernatant was discarded. The cells were resuspended with 1 mL of cold PBS as a wash before being  
183 centrifuged again. The PBS was discarded, and the pellet was flash-frozen on dry ice and stored at -80 °C until  
184 extraction. For extraction, cell pellets were thawed and then 200 µL of 0.5 M PCA was added to disrupt the cells and  
185 allow nucleotide sugars to release. The sample was spiked with 0.5 µL of 20 mM GDP-Glc as an internal standard.  
186 The lysate was incubated on ice for 5 mins before being centrifuged at 2,000 xg for 3 mins at 4 °C. The supernatant  
187 was removed and transferred to a new tube. The cell pellet was then again subjected to 200 µL of 0.5 M PCA and  
188 0.5 µL of 20 mM GDP-Glc and incubated on ice for 5 mins before being centrifuged at 18,000 xg for 3 mins at 4 °C.  
189 The two supernatants were then merged and neutralized with 56 µL of 2.5 M KOH in 1.1 M K<sub>2</sub>HPO<sub>4</sub>. The sample was  
190 then incubated for 2 more mins on ice before being centrifuged at 18,000 xg for 1 min to remove the potassium  
191 perchlorate precipitate. The supernatant was filtered with a 0.2 µm PVDF syringe filter into a new tube and stored  
192 at 4 °C until HPLC analysis. A 5-point calibration curve was made for all nucleotide sugars for quantitation.

193 **Data Analyses:** The change in mAb production was calculated by equation 1 (eq. 1), by dividing the change in titer  
194 between two time points, mAb titer at time 2 (t<sub>2</sub>) and mAb titer at time 1 (t<sub>1</sub>). The integrated viable cell density  
195 (IVCD) was calculated by equation 2 (eq. 2), where the change in viable cell density (VCD) was calculated by the  
196 summation of the VCD at two time points multiplied by the change in time, divided by 2. Productivity was measured  
197 by equation 3 (eq. 3), where the productivity is equal to the change in mAb titer divided by the change in IVCD  
198 between two time points. This equation was also used to measure consumption rates of glucose and galactose by  
199 swapping the change in mAb titer for either change in glucose or galactose concentration.

200

201 (eq. 1)  $mAb_{t_2-t_1} = mAb_{t_2} - mAb_{t_1}$

202 (eq. 2)  $IVCD_{t_2-t_1} = (VCD_{t_2} + VCD_{t_1}) * (t_2 - t_1)/2$

203 (eq. 3)  $Q_{mAb} = mAb_{t_2-t_1}/IVCD_{t_2-t_1}$

## 204 Results & Discussion

### 205 Fed-Batch Culture Performance:

206 This work aims to understand how the addition of galactose as a supplemental carbon source may influence mAb  
207 production and N-linked glycosylation over time. Here we looked at the addition of a feed, either glucose or glucose  
208 with galactose, while also varying the feeding times to be either daily (24 h) or alternative days (48 h) to understand  
209 how this may influence the CHO cell culture as well as the mAb that is produced. Manganese was added to the  
210 galactose-supplemented cultures to 1 µM during the first feeding to increase relative glycosylation further.

211 The viable cell densities (VCD) between all conditions influenced the peak viabilities and the longevity of all cultures  
212 that were run. Cultures fed daily had a higher peak density than those fed only on alternative days (**Figure 1A**). Daily  
213 feeding control cultures using both feed strategies saw a peak VCD of 26.6 x 10<sup>6</sup> cells/mL, while alternative day  
214 control and supplementation cultures saw a peak VCD of 22.8 x 10<sup>6</sup> cells/mL and 24.3 x 10<sup>6</sup> cells/mL, respectively. A  
215 paired T-test showed statistical significance between the feeding times (daily vs. alternative day) but not between  
216 the control and supplementation groups (**Supplemental Figure S1**). Based on these results, the timing of feeding can  
217 be inferred as having a more considerable impact on the peak VCD than the addition of galactose as a secondary  
218 carbon source. When looking at culture longevity (**Figure 1B**), all cell culture conditions survived with cell viability  
219 above 70% up until day 10 and were harvested once the cell viability fell below this threshold. Only one condition,

220 the alternative day-fed culture with supplementation, survived until day 11. Because of this, we decided to use day  
221 10 as the cutoff for all further analyses within this study.

222 Ammonia production followed similar trends between feeding regimes until day 7, when trends diverged based on  
223 the feed frequency (**Figure 1C**). The cultures fed daily saw a peak ammonia concentration around day 4 whereas the  
224 control and supplemented cultures both peaked at ~2 g/L ammonia. Afterward, the ammonia concentration in these  
225 cultures decreased to roughly 1 g/L. No statistical significance was seen between these groups. For the alternative  
226 day control and supplementation cultures, ammonia peaked on day 4 at 2.23 and 2.31 g/L, respectively. The  
227 ammonia concentration then decreased until day 7 and rapidly increased until day 10 where the alternative day feed  
228 control saw a peak on day 10 of 5.31 g/L ammonia, while the alternative day supplementation saw a peak of 4.13  
229 g/L. The increase in ammonia concentrations signals metabolic stress within the culture and indicates shifts in amino  
230 acid metabolism, especially within alanine metabolism.<sup>31</sup> Extracellular alanine concentration peaked at 3 mM for the  
231 alternative day feeding cultures and then decreased until the end of the culture. However, for daily fed cultures, the  
232 extracellular alanine concentration increased throughout the culture until peaking on day 10 at 5.5 and 4.1 mM  
233 alanine for daily control and supplemented cultures, respectively (**Supplemental Figure S2**). One explanation could  
234 be a more efficient utilization of ammonia detoxication of the daily fed cultures through alanine production within  
235 these cultures by the conversation of intracellular ammonia and pyruvate into alanine.<sup>31</sup>

236 Lactate production (**Figure 1D**) followed a similar trend between feeding days, reaching a peak lactate concentration  
237 on day 5 before the metabolic shift to lactate consumption. The daily control and supplemented feeds both saw a  
238 peak lactate production of 3.5 g/L. Lactate concentration in the medium then decreased through the rest of the  
239 culture. Alternative day feeding cultures saw a lower peak lactate concentration on day 5 of 2.77 g/L. These cultures  
240 then saw a decrease in the lactate levels until day 8 and stayed low until day 10. The increased lactate production  
241 can be attributed to the more periodic feeding rate of the glucose allowing for higher glucose metabolism towards  
242 lactate.<sup>32</sup> For this reason, the alternative day-feeding cultures saw lower glucose levels than the daily-fed  
243 counterpart, signaling a metabolic switch within the cells.<sup>33</sup>

#### 244 **Fed-Batch Consumption of Glucose and Galactose**

245 To explore the influence of glucose and galactose consumption, the cultures were controlled to 5 g/L glucose daily  
246 or on alternative days, as explained in the methods section. To characterize galactose as a feed additive, the feeds  
247 were spiked with galactose at a ratio of 3:10 (galactose: glucose w/w). This ratio was decided based on past literature  
248 examining galactose dose dependence's influence.<sup>17,34,35</sup> Similarly, the galactose-supplemented cultures were spiked  
249 to 1  $\mu$ M manganese on the first feed day, a dose chosen to mirror previous literature.

250 The top graph of **Figure 1E** shows the extracellular glucose present for the alternative day feeding regimens, while  
251 the bottom graph shows glucose concentrations for daily feedings. For the alternative day feeding regimen, the first  
252 feeding was done on day 4 when the glucose concentration was 1.63 g/L for the control and 1.77 g/L for the  
253 supplemented cultures. The glucose within the cultures was depleted on feeding days after the first feed. Before the  
254 second feed, the glucose concentrations were 0.33 g/L (control) and 0.92 g/L (supplemented); the differences  
255 between these concentrations may be attributed to having galactose as a secondary carbon source within the  
256 supplemented cultures. There was no difference in glucose consumption trends for the alternative day feeding  
257 regimens based on glucose consumption rates (**Figure 1F**). However, it may be noticed that the alternative day  
258 feeding regimens did not vary largely from one another, and consumption rates tended to be higher during the first  
259 4 days of the culture versus the daily feeding cultures. For the daily feeding samples, the first feed was done on day  
260 3 when the concentrations were around 3.5 g/L for the control and 3.3 g/L for the supplemented cultures. The  
261 difference in glucose concentrations within these cultures' conditions can be seen and shows that there was less  
262 consumption of glucose when galactose was present in the culture. However this may be caused by the co-

263 consumption of lactate during the latter phase of the cultures on and after day 5. Nevertheless, results are in  
264 agreement with earlier work looking at the comparison of glucose consumption in the presence of galactose.<sup>21</sup>

265 There was a steady accumulation of galactose in the supplemented cultures (**Figure 1G**). Specific galactose  
266 consumption rates were highest within the first 24 hours of supplementation and would decrease over time (**Figure**  
267 **1H**). This may be caused by the drastic increase in the concentration after the initial feeding of galactose. Both  
268 supplemented culture conditions saw a consumption rate between 20 and 40 pg/cell/day. Interestingly, the daily  
269 supplemented cultures saw a slow plateau in the consumption rates of galactose while the alternative day cultures  
270 had an increased rate after feeding and lower rates on days in between feeding. These changes in the specific  
271 consumption rate are consistent with previous studies where the galactose consumption rate is dose-dependent  
272 and higher galactose in the medium will increase the consumption rate until a point of saturation.<sup>21,36</sup>

### 273 **Fed-Batch Culture Productivity:**

274 MAb titer and productivity were studied to understand the influence of the feeding regimen and supplementation.  
275 All cultures reached their peak titer around day 9, then saw a titer decrease within the reactor on subsequent days  
276 (**Figure 2A**). This loss may be due to protein degradation. Daily feeding cultures saw a peak titer of 1.12 g/L (control),  
277 and 1.23 g/L (supplemented). The alternative day feeding samples saw a peak titer of 1.11 g/L (control) and 1.19 g/L  
278 (supplemented). A paired comparison plot analysis did not show any statistical significance between these cultures  
279 in respect to peak titer (data not shown). This may be due to a nutrient limitation as extracellular asparagine was  
280 exhausted by day 6 in all cultures (**Supplemental Figure S2**), a critical amino acid known to influence mAb production  
281 in CHO Cells.<sup>37-39</sup>

282 When comparing cell-specific production rates (**Figure 2B**), a trend can be seen between the feeding regimens. The  
283 average cell-specific mAb productivity during the first 6 days of culture was higher for the alternate-day feeding  
284 cultures (control and supplemented) versus that of the daily feeding cultures. However, there was no statistical  
285 difference between the control and supplementation groups, meaning that the addition of galactose and manganese  
286 did not influence the mAb productivity rate, and any minor difference in productivity is attributed to the feed timing.  
287 Since the alternative day cultures were controlled to 5 g/L glucose, glucose depletion did not interrupt mAb  
288 productivity. Fan *et al.* investigated the influence of mAb productivity under glucose starvation and found an inverse  
289 correlation between mAb productivity and the degree of glucose starvation. However, mild starvation did not  
290 influence mAb productivity, which is in alignment with the results seen in our study.<sup>40</sup>

### 291 **Fed-Batch Monoclonal Antibody Glycan Indexes**

292 Two important glycan indices, galactosylation index (GI, **Figure 2C**) and mannosylation index (MI, **Figure 2E**) were  
293 calculated from the relative abundances of all observed glycoforms. These values are accumulated relative  
294 abundances per day. A separate graph for each glycoform is shown in **Supplemental Figure S3**.

295 A truncated explanation of the interconnected network and metabolism between glycolysis, the Leloir pathway and  
296 glycosylation is portrayed in **Scheme 2**. Glucose is taken up by the cell and used for glycolysis, where part of the  
297 energy produced goes toward the TCA cycle and protein production. Galactose is also taken up by the cell and  
298 metabolized by the Leloir pathway, where it can then enter the glycolytic pathway via the intermediate glucose-1-  
299 phosphate (Glc-1-P). However, part of the incoming galactose will also produce UDP-galactose (UDP-gal), a glycan  
300 precursor to produce galactosylated mAb species. The bottom of the scheme briefly depicts how the glycosylated  
301 mAb is shuttled from the endoplasmic reticulum (ER) to the Golgi apparatus while going through multiple trimming  
302 steps from Man8 to eventually G0 or G0F after the addition of GlcNAc to the chitobiose core. From there these  
303 transient species can become galactosylated by the addition of galactose by one of several galactosyltransferases  
304 (i.e., B4GALT) using manganese as the cofactor.

305 MAb galactosylation on day three did not show any statistical significance between the cultures as the sampling was  
306 done prior to the first feed addition. Interestingly, the GI followed similar trends between the galactose-  
307 supplemented and control cultures, where the daily feed control had a GI of 23.7% on day 10, roughly 10% less than  
308 the alternative day feeding control, which had a GI of 34%. Cultures fed with galactose and spiked with manganese  
309 saw a significant increase in the rate of galactosylation against their glucose-fed control counterparts. Daily fed  
310 cultures supplemented saw a GI of 55.5%, while the alternative day-supplemented feeding samples had a GI rate of  
311 69.1%, a 13.6% increase. The alternative day feeding strategies increased the rate of galactosylation more than their  
312 daily feed counterparts. Galactose-supplemented cultures saw an increase in GI as this allowed for an increase in  
313 UDP-Gal biosynthesis from the fed galactose through the Leloir pathway.<sup>41</sup> There is a positive correlation between  
314 UDP-Gal levels (**Figure 2F**) and the relative GI within the first half of the cultures' duration. Although the mAb  
315 productivity was higher with the alternative day feeding regimen (**Figure 2B**), the increased UDP-Gal pool and a  
316 possible increase in the galactosyltransferase activities may aid galactose occupancy of the produced mAbs. These  
317 findings agree with Fan et al.'s similar glucose starvation study, where high and severe glucose starvation cultures  
318 saw an increase in GI versus low starvation and non-glucose starved cultures.<sup>40</sup>

319 Relative accumulated mannosylation is shown to be under 3% for all cultures besides the alternative day feed  
320 control (**Figure 2D**). With the addition of galactose and manganese to the cultures, the MI index decreases for both  
321 feeding regimens within the study to 2% for the alternative day supplementation cultures and 1.6% for the daily  
322 feed-supplemented cultures. Without the addition of galactose and manganese, the daily feed control culture saw  
323 a MI of 2.5% while the alternative day feeding control saw a statistically significant MI of 4.5%. This increase in  
324 mannosylation is due to the high ammonia accumulation in the alternative day control culture and is usually  
325 associated with low UDP-GlcNac pools.

326 The UDP-glucose (UDP-glc) pool (**Figure 2E**) within the alternative day feeding control saw a spike in levels after  
327 each feeding. However, UDP-glc levels quickly decreased after day 7, along with the UDP-gal levels. This may indicate  
328 that some of the nucleotide sugars are metabolized towards other pathways, instead of towards glycosylation. This  
329 is also further exemplified when comparing the nucleotide sugar pools and MI for the alternative day feed control  
330 versus the daily feed control cultures. Low glucose concentrations in the medium are known to deplete precursors  
331 required for glycan maturation which can also be linked with the UDP-glc levels.<sup>42-44</sup>

### 332 **Fed-Batch Temporal Changes in Glycosylation**

333 To build a temporal understanding of the glycosylation within the fed-batch cultures, the daily relative glycan  
334 isomers were calculated based on daily accumulation rates and titers based on changes in weighted averages (**Figure**  
335 **3**). The values were calculated until peak titer was reached (culture day 9) since subsequent days saw a drop in titer.  
336 Sialylated species are not shown as there were minimal to no changes in these species regarding daily glycosylation  
337 rates. Each glycoform showed a similar trend as with the accumulated glycan index values mentioned above, where  
338 cultures supplemented with galactose and manganese saw an increase in galactosylated species and a decrease in  
339 other transient and truncates species such as G0F-GlcNac and G0F.

340 When looking at the truncated G0F-GlnNac isoform (**Figure 3A**), this species tended to stay between 1-2% under all  
341 conditions besides the daily feed control culture, where the value increased to roughly 4%. Similarly, for the G0  
342 isoform (**Figure 3C**), the abundance tended to decrease through culture duration. However, the alternative day  
343 feeding regimen tended to decrease the abundance of this isoform more than daily feed cultures.

344 G0F tends to be the most abundant glycoform seen for mAbs (**Figure 3D**). There is an increase in this glycoform  
345 under the control daily feeding regimen compared to that of the alternative day control, where the relative daily  
346 abundance of this isoform is lower through the second half of the cultures. A bottleneck in processing this glycoform  
347 further to produce galactosylation is assumed as the G0F glycoform tends to increase over time in the culture. When



348 galactose and manganese are added, there is a decrease in this bottleneck. With daily supplementation culture, the  
349 G0F glycoform reaches a steady state secretion of G0F glycoforms around 40% at day 5. However, when compared  
350 with the alternative day supplementation cultures, a steady decrease in the G0F glycoform is seen, and on day 9 the  
351 relative abundance of the G0F glycoform produced is under 20%. This would indicate that under the alternative day  
352 feeding, where glucose is starved in the culture, the metabolism of galactose is toward producing galactosylated  
353 species of mAb than toward energy metabolism.

354 When looking at the galactose mAb isoforms, new information regarding the galactosylation rates can be revealed.  
355 This is not very apparent when looking at the lower abundance galactofoms such as G1 (**Figure 3E**), G1' (not shown),  
356 or G2 (**Figure 3F**), as small changes are harder to capture with these isoforms. **Figure 3G and 3H** show G1F and G1F'  
357 glycoforms. An inverse relationship can be seen here versus the G0F isoform as a decrease in the G0F isoform and  
358 an increase in the G1F+G1F' isoforms indicates that the addition of galactose and manganese increased the  
359 galactosylation of the antibody. The cultures without supplementation saw a significantly lower, but steady  
360 production rate of the double galactose occupied glycan isoform G2F (**Figure 3I**). During daily supplementation,  
361 there was an increase of the G2F isoform that produced a relatively stable abundance of G2F throughout the second  
362 half of the culture, around 8-10% relative G2F species a day. In comparison, the G2F species increased in its daily  
363 produced abundance and reached almost 20% by day 9 when the culture was subjected to the alternative day  
364 supplementation feeding regimen. This can help understand why a discrepancy is seen in the GI between the  
365 alternative and daily supplementation samples, as the alternative day-supplemented cultures had an increase in the  
366 production of the G2F glycoform over time. However, since sialylation was not altered with the supplementation of  
367 feeding interval, there may be another bottleneck with the corresponding sialyltransferase activities. Though,  
368 manganese and galactose supplementation does not influence the activity of sialyltransferase and Trastuzumab is  
369 known to have little to no sialic acid glycoforms.

370 It is also worth mentioning that the relative daily abundances of the high mannose isoform Man5 (**Figure 3B**) was  
371 not influenced by the addition of galactose or manganese. When comparing the daily and alternative day feeding  
372 regimen controls, the daily fed cultures saw a Man5 abundance similar to the supplemented cultures (between ~2-  
373 3%). However, the alternative day feeding control saw an increase in Man5 on and after day 7 of culture and peaked  
374 by day 9 at ~6.5%. This increase in the high mannose species indicates stress within the glycosylation metabolism.  
375 One hypothesis is that the glucose metabolism was toward energy production rather than mAb glycosylation as the  
376 extracellular glucose levels were critically low by day 5 of the cultures with alternative day feeding regimens.

### 377 **Perfusion Culture Performance**

378 Perfusion cultures were run to further elucidate the glycosylation dynamics where there were no limitations to  
379 nutrients as in fed-batch. These cultures were run similarly, where the control used HIP-CHO medium, and the  
380 supplemented medium consisted of HIP-CHO medium (containing 6 g/L glucose) with the addition of 1.8 g/L  
381 galactose and 1  $\mu$ M manganese. This glucose to galactose ratio is equivalent to the feed ratio used in the fed-batch  
382 study. Both cultures were run as batch cultures until the glucose concentration in the reactors fell to or below 2 g/L,  
383 at which time perfusion was started to increase nutrients in the bioreactor culture. The permeate and bleed pumps  
384 were manually adjusted daily to reach and maintain a cell density of around 20 million cells/mL under both  
385 conditions (**Figure 4A**). The pumps were adjusted proportionally to maintain 1 VVD throughout steady-state  
386 perfusion. Experiments were compared to day 13; however, the control reactor was run for 20 days.

387 For the process conditions, the cultures' viability (**Figure 4B**) under both conditions stayed above 90% for most of  
388 the run. Glucose levels in the culture were maintained roughly between 0.5 and 1 g/L under both conditions (**Figure**  
389 **4C**). The galactose levels (**Figure 4D**) in the +Gal/Mn supplemented culture saw a galactose level within the medium  
390 between 1 and 1.5 g/L, which would indicate around 0.3 – 0.8 g/L of galactose was being consumed daily during  
391 steady-state perfusion after reaching peak cell density. Ammonia levels within the +Gal/Mn supplemented culture

392 were lower than that of the control by roughly 0.5 g/L (**Figure 4E**), and lactate levels were higher on average for the  
393 +Gal/Mn supplemented culture versus the control (**Figure 4F**).

394 When comparing the extracellular amino acid profiles between culture conditions (**Supplemental Figure S4**), the  
395 amino acids all followed a similar trend, however, the +Gal/Mn culture had a higher level of aspartate in the culture  
396 which is correlated with higher cell productivity but not with cell growth.<sup>45</sup> These results are consistent with the  
397 increased mAb productivity, as explained in the next section.

### 398 **Perfusion Culture Titer and Glycosylation**

399 On average, the +Gal/Mn supplemented bioreactor produced more product versus the control run (**Figure 5A**).  
400 Perturbations can be seen in each condition which can be accounted for by manual changes in the bleed and  
401 permeate pumps which influence the cell density. However, even with these perturbations, the reactor titer for the  
402 +Gal/Mn supplemented reactor produced more product than the control. Under fed-batch experimentation, it is  
403 known that the use of galactose as a substitute for glucose will have diminishing returns on production due to the  
404 lower transport of galactose over glucose. A study by Gramer et al. looked at the use of uridine, manganese and  
405 galactose on a fed-batch culture and saw a low bolus addition of these feed additives (i.e., 0.9 g/L galactose, 2  $\mu$ M  
406  $MnCl_2$ , and 1mM uridine) will have a positive impact on titer, but will marginally decrease with an increase in  
407 galactose, manganese and uridine concentrations.<sup>21</sup> This may also apply to perfusion, which may give insight into  
408 why the productivity is higher than the control culture. To our knowledge, no literature relating the addition of  
409 galactose as a feed supplement to productivity increase exists. However, literature that looks to substitute glucose  
410 partially with galactose is known to have an unfavorable influence on productivity and final titer.<sup>46,47</sup>

411 The GI can be seen in **Figure 5B**. The galactosylation rate for the control culture was similar to the 24-hour control  
412 fed-batch culture in which the relative galactosylation reached around 25% by day 10. For the +Gal/Mn  
413 supplemented culture, the galactosylation rate increases to 54-56% through the culture duration, similar to the 24-  
414 hour supplement-fed batch culture experiment described above. Investigating the UDP-Glc levels (**Figure 5E**), fed-  
415 batch cultures saw a decrease of the UDP-Glc levels toward the end of the culture for the control cultures. A similar  
416 trend can be seen with perfusion; however, the control perfusion run never depletes its UDP-Glc pool since there is  
417 a constant influx of glucose into the medium. The +Gal/Mn perfusion culture exhibited a constant UDP-Glc level  
418 within the cells, interestingly after day 10 the control saw a drop in the UDP-Glc levels while the level stayed  
419 between 0.4-0.6 fmol/cell with the +Gal/Mn culture. This could be accounted for by the conversion of UDP-Gal to  
420 UDP-Glc.

421 When comparing the UDP-Gal levels between the perfusion cultures, a significant increase can be seen by adding  
422 galactose and manganese to the feed (**Figure 5D**). This high level of UDP-Gal in the +Gal/Mn explains the increasing  
423 rate of galactosylation. Here it seems that the highest level of galactosylation is 55%, while under fed-batch  
424 alternative day feeding where glucose was starved a higher accumulated rate of 70% was seen. This is an interesting  
425 phenomenon, as described earlier. Running a perfusion reactor with continuous feeding rather than daily or  
426 alternative day feeding seems to have a lower rate of galactosylation. Further studies can be done to understand  
427 the influence of glucose starvation on galactosylation to elucidate further pathway changes that influenced a  
428 favorable increase in the galactosylation rate.

429 The MI (**Figure 5C**) also saw a steady state of mannosylation at around 2% for the control culture and 1.5% for the  
430 +Gal/Mn culture. These results are similar to our results with the fed-batch daily feeding control and Gal/Mn-  
431 supplemented cultures. A breakdown of each glycoform present can be seen in **Supplementary Figure S3**.

### 432 **Conclusion**

433 In this work we have sought an understanding of the temporal changes of mAb glycosylation patterns during CHO  
434 cell culture bioprocessing explained by changes in the key metabolites when feeding galactose and manganese into  
435 the cultures. This was accomplished by studying two operation modes: (1) a fed-batch bioprocess in which galactose  
436 was fed proportionally with the glucose feed, as well as with the addition of manganese on the first day of feeding,  
437 either daily or on alternative days to understand glucose limitation as a secondary variable in the study; (2) a  
438 perfusion operation (non-nutrient limited), where galactose and manganese were spiked into the media and the  
439 culture was maintained in a steady state.

440 For the fed-batch study, results showed that the feeding schedule, rather than the addition of galactose, had a  
441 profound and favorable effect on peak cell density. Daily feeding regimens increased the peak lactate produced by  
442 0.7 g/L over alternative feeding strategies. However, alternative day feeding saw higher ammonia production in the  
443 latter stages of the culture as daily fed cultures were better able to metabolize ammonia to alanine. Galactose  
444 feeding and feeding times had a marginal impact on the glucose consumption rate, which may also be due to co-  
445 consumption of lactate. Galactose consumption rates were found to increase with the extracellular galactose  
446 concentration, consistent with previous findings. While galactose and the feeding regimen did not influence peak  
447 titers, the alternative day fed cultures saw higher productivity on average through the first half of culture. In addition  
448 to these differences in culture performance, the feeding regimens were found to have the most considerable impact  
449 on mAb glycosylation. The addition of galactose and manganese significantly increased the rate of galactosylation  
450 with alternative day fed cultures exhibiting the highest relative galactosylation of 70% compared to 50% of the daily  
451 galactose fed cultures. Mannosylation also decreased in all instances with the galactose and manganese additions  
452 over the controls.

453 For the perfusion study, the addition of galactose and manganese increased the titer over the control culture. An  
454 increase in the galactosylation was also observed where the galactose and manganese-supplemented culture saw  
455 55% relative galactosylation, while the control decreased to roughly 25%. The addition of galactose was able to  
456 restore UDP-glucose pools over the control where UDP-glucose was depleted over the duration of the culture.  
457 Overall, the perfusion study gave more insight into the glycosylation network and the influence that glycan  
458 precursors have on metabolism and the glycosylation pathway.

459 In summary, we were able to gain a temporal understanding of how galactose and manganese influence mAb  
460 product quality. Future work will focus on developing the understanding and PAT necessary to build process control  
461 schemes based on more precise dosing of glycan precursors to promote homogenous glycosylation during upstream  
462 bioprocessing.

463  
464 **Disclaimers:**

465 The authors declare that they have no competing financial interests. This article reflects the author's views and  
466 should not be construed to represent FDA's views or policies. Certain commercial equipment, instruments, or  
467 materials are identified in this paper to foster understanding. Such identification does not imply recommendation  
468 or endorsement by the FDA.

469 **Author Contributions:**

470 **Aron Gyorgypal:** Conceptualization, Investigation, Methodology, Data Curation, Formal Analysis, Writing – Original  
471 draft, Writing: review & editing. **Erica Fratz-Berilla:** Conceptualization, Investigation, Methodology, Data Curation,  
472 Supervision, Writing: review & editing. **Casey Kohnhorst:** Conceptualization, Investigation, Methodology, Data  
473 Curation, Supervision, Writing: review & editing. **David N. Powers:** Conceptualization, Investigation, Methodology,  
474 Supervision, Writing: review & editing. **Shishir P.S. Chundawat:** Conceptualization, Writing - Review & Editing

475

476        **Acknowledgments**

477        This work was supported by NIIMBL Project Award PC5.2-112 and supported in part by the appointment of Aron  
478        Gyorgypal to the Research Participation Program at FDA, administered by ORAU through the US Department of  
479        Energy Oak Ridge Institute for Science and Education (ORISE). The authors would like to thank the Office of  
480        Biotechnology Products (OBP) Bioprocessing Lab (Dr. Cyrus Agarabi, Dr. David N. Powers, Ms. Xin Bush, and Ms.  
481        Nicole Azer) at the US FDA Center for Drug Evaluation and Research (CDER) for their support in this project. The  
482        authors also thank Dr. Natasha Ilyushina (CDER/OBP) and Dr. Omnia Ismaiel (CDER/Office of Clinical Pharmacology  
483        (OCP)) for their critical review of this manuscript. The authors also thank GenScript Biotech Corporation (Piscataway,  
484        NJ) for the Trastuzumab cell line gift to Rutgers University.  
485

486 **References:**

- 487 1. Bakalos G, Zintzaras E. Drug Discontinuation in Studies Including a Switch From an Originator to a  
488 Biosimilar Monoclonal Antibody: A Systematic Literature Review. *Clin Ther*. 2019;41(1):155-173.e13.  
489 doi:10.1016/j.clinthera.2018.11.002
- 490 2. Iqbal Z, Sadaf S. Biosimilars: A Comparative Study of Regulatory, Safety and Pharmacovigilance Monograph  
491 in the Developed and Developing Economies. *J Pharm Pharm Sci*. 2022;25(6):149-182.  
492 doi:10.18433/jpps32433
- 493 3. Liu L. Antibody glycosylation and its impact on the pharmacokinetics and pharmacodynamics of  
494 monoclonal antibodies and Fc-fusion proteins. *J Pharm Sci*. 2015;104(6):1866-1884. doi:10.1002/jps.24444
- 495 4. Kurki P, Barry S, Bourges I, Tsantili P, Wolff-Holz E. Safety, Immunogenicity and Interchangeability of  
496 Biosimilar Monoclonal Antibodies and Fusion Proteins: A Regulatory Perspective. *Drugs*. 2021;81(16):1881-  
497 1896. doi:10.1007/s40265-021-01601-2
- 498 5. Ivarsson M, Villiger TK, Morbidelli M, Soos M. Evaluating the impact of cell culture process parameters on  
499 monoclonal antibody N-glycosylation. *J Biotechnol*. 2014;188:88-96. doi:10.1016/j.jbiotec.2014.08.026
- 500 6. Brunner M, Fricke J, Kroll P, Herwig C. Investigation of the interactions of critical scale-up parameters (pH,  
501 pO<sub>2</sub> and pCO<sub>2</sub>) on CHO batch performance and critical quality attributes. *Bioprocess Biosyst Eng*.  
502 2017;40(2):251-263. doi:10.1007/s00449-016-1693-7
- 503 7. Zhang P, Woen S, Wang T, et al. Challenges of glycosylation analysis and control: An integrated approach to  
504 producing optimal and consistent therapeutic drugs. *Drug Discov Today*. 2016;21(5):740-765.  
505 doi:10.1016/j.drudis.2016.01.006
- 506 8. Jiang R, Chen H, Xu S. pH excursions impact CHO cell culture performance and antibody N-linked  
507 glycosylation. *Bioprocess Biosyst Eng*. 2018;41(12):1731-1741. doi:10.1007/s00449-018-1996-y
- 508 9. Tiwold EK, Gyorgypal A, Chundawat SPS. Recent Advances in Biologic Therapeutic N-Glycan Preparation  
509 Techniques and Analytical Methods for Facilitating Biomanufacturing Automation. *J Pharm Sci*. Published  
510 online January 19, 2023. doi:10.1016/j.xphs.2023.01.012
- 511 10. Mizushima T, Yagi H, Takemoto E, et al. Structural basis for improved efficacy of therapeutic antibodies on  
512 defucosylation of their Fc glycans. *Genes to Cells*. 2011;16(11):1071-1080. doi:10.1111/j.1365-  
513 2443.2011.01552.x
- 514 11. Ferrara C, Grau S, Jaeger C, et al. Unique carbohydrate-carbohydrate interactions are required for high  
515 affinity binding between FcγRIII and antibodies lacking core fucose. *Proc Natl Acad Sci U S A*.  
516 2011;108(31):12669-12674. doi:10.1073/pnas.1108455108
- 517 12. Aoyama M, Hashii N, Tsukimura W, et al. Effects of terminal galactose residues in mannose α1-6 arm of Fc-  
518 glycan on the effector functions of therapeutic monoclonal antibodies. *MAbs*. 2019;11(5):826-836.  
519 doi:10.1080/19420862.2019.1608143
- 520 13. Bas M, Terrier A, Jacque E, et al. Fc Sialylation Prolongs Serum Half-Life of Therapeutic Antibodies. *J*  
521 *Immunol*. 2019;202(5):1582-1594. doi:10.4049/jimmunol.1800896
- 522 14. Böhm S, Schwab I, Lux A, Nimmerjahn F. The role of sialic acid as a modulator of the anti-inflammatory  
523 activity of IgG. *Semin Immunopathol*. 2012;34(3):443-453. doi:10.1007/s00281-012-0308-x
- 524 15. Mastrangeli R, Audino MC, Palinsky W, Broly H, Bierau H. The Formidable Challenge of Controlling High  
525 Mannose-Type N-Glycans in Therapeutic mAbs. *Trends Biotechnol*. 2020;38(10):1154-1168.  
526 doi:10.1016/j.tibtech.2020.05.009
- 527 16. Goetze AM, Liu YD, Zhang Z, et al. High-mannose glycans on the Fc region of therapeutic IgG antibodies

- 528 increase serum clearance in humans. *Glycobiology*. 2011;21(7):949-959. doi:10.1093/glycob/cwr027
- 529 17. Liu J, Wang J, Fan L, et al. Galactose supplementation enhance sialylation of recombinant Fc-fusion protein  
530 in CHO cell: an insight into the role of galactosylation in sialylation. *World J Microbiol Biotechnol*.  
531 2015;31(7):1147-1156. doi:10.1007/s11274-015-1864-8
- 532 18. Zhang L, Castan A, Stevenson J, Chatzissavidou N, Vilaplana F, Chotteau V. Combined effects of  
533 glycosylation precursors and lactate on the glycoprofile of IgG produced by CHO cells. *J Biotechnol*.  
534 2019;289(October 2018):71-79. doi:10.1016/j.jbiotec.2018.11.004
- 535 19. Sha S, Yoon S. An investigation of nucleotide sugar dynamics under the galactose supplementation in CHO  
536 cell culture. *Process Biochem*. 2019;81(February):165-174. doi:10.1016/j.procbio.2019.03.020
- 537 20. Madabhushi SR, Podtelezhnikov AA, Murgolo N, Xu S, Lin H. Understanding the effect of increased cell  
538 specific productivity on galactosylation of monoclonal antibodies produced using Chinese hamster ovary  
539 cells. *J Biotechnol*. 2021;329(February):92-103. doi:10.1016/j.jbiotec.2021.01.023
- 540 21. Gramer MJ, Eckblad JJ, Donahue R, et al. Modulation of antibody galactosylation through feeding of  
541 uridine, manganese chloride, and galactose. *Biotechnol Bioeng*. 2011;108(7):1591-1602.  
542 doi:10.1002/bit.23075
- 543 22. Kildegaard HF, Fan Y, Sen JW, Larsen B, Andersen MR. Glycoprofilng effects of media additives on IgG  
544 produced by CHO cells in fed-batch bioreactors. *Biotechnol Bioeng*. 2016;113(2):359-366.  
545 doi:10.1002/bit.25715
- 546 23. Ehret J, Zimmermann M, Eichhorn T, Zimmer A. Impact of cell culture media additives on IgG glycosylation  
547 produced in Chinese hamster ovary cells. *Biotechnol Bioeng*. 2019;116(4):816-830. doi:10.1002/bit.26904
- 548 24. Xu J, Rehmann MS, Tian J, et al. Rosmarinic acid, a new raw material, doubled monoclonal antibody titer in  
549 cell culture manufacturing. *Biochem Eng J*. 2020;160(May). doi:10.1016/j.bej.2020.107637
- 550 25. Chung S, Tian J, Tan Z, et al. Modulating cell culture oxidative stress reduces protein glycation and acidic  
551 charge variant formation. *MAbs*. 2019;11(1):205-216. doi:10.1080/19420862.2018.1537533
- 552 26. Wasalathanthri DP, Rehmann MS, Song Y, et al. Technology outlook for real-time quality attribute and  
553 process parameter monitoring in biopharmaceutical development—A review. *Biotechnol Bioeng*.  
554 2020;117(10):3182-3198. doi:10.1002/bit.27461
- 555 27. Gerzon G, Sheng Y, Kirkitadze M. Process Analytical Technologies – Advances in bioprocess integration and  
556 future perspectives. *J Pharm Biomed Anal*. 2022;207:114379. doi:10.1016/j.jpba.2021.114379
- 557 28. Gyorgypal A, Potter O, Chaturvedi A, et al. Automated Workflow for Instant Labeling and Real-Time  
558 Monitoring of Monoclonal Antibody N-Glycosylation. *bioRxiv*. 2022;3:2022.12.22.521623.  
559 doi:10.1101/2022.12.22.521623
- 560 29. Gyorgypal A, P.S. Chundawat S. Integrated Process Analytical Platform for Automated Monitoring of  
561 Monoclonal Antibody N-Linked Glycosylation. *Anal Chem*. 2022;0(0). doi:10.1021/acs.analchem.1c05396
- 562 30. Sha S, Handelsman G, Agarabi C, Yoon S. A high-resolution measurement of nucleotide sugars by using ion-  
563 pair reverse chromatography and tandem columns. *Anal Bioanal Chem*. 2020;412(15):3683-3693.  
564 doi:10.1007/s00216-020-02608-6
- 565 31. Synoground BF, McGraw CE, Elliott KS, et al. Transient ammonia stress on Chinese hamster ovary (CHO)  
566 cells yield alterations to alanine metabolism and IgG glycosylation profiles. *Biotechnol J*. 2021;16(7):1-13.  
567 doi:10.1002/biot.202100098
- 568 32. Wilkens CA, Altamirano C, Gerdtzen ZP. Comparative metabolic analysis of lactate for CHO cells in glucose  
569 and galactose. *Biotechnol Bioprocess Eng*. 2011;16(4):714-724. doi:10.1007/s12257-010-0409-0

- 570 33. Pérez-Rodríguez S, Ramírez-Lira M de J, Trujillo-Roldán MA, Valdez-Cruz NA. Nutrient supplementation  
571 strategy improves cell concentration and longevity, monoclonal antibody production and lactate  
572 metabolism of Chinese hamster ovary cells. *Bioengineered*. 2020;11(1):463-471.  
573 doi:10.1080/21655979.2020.1744266
- 574 34. Braasch K. *Dielectric and Precursor Analysis to Study Metabolic Effects on CHO Cell Viability and Antibody*  
575 *Glycosylation*. 2015.
- 576 35. Hills AE, Patel A, Boyd P, James DC. Metabolic control of recombinant monoclonal antibody N-glycosylation  
577 in GS-NS0 cells. *Biotechnol Bioeng*. 2001;75(2):239-251. doi:10.1002/bit.10022
- 578 36. Kotidis P, Jedrzejewski P, Sou SN, et al. Model-based optimization of antibody galactosylation in CHO cell  
579 culture. *Biotechnol Bioeng*. 2019;116(7):1612-1626. doi:10.1002/bit.26960
- 580 37. Ritacco F V., Wu Y, Khetan A. Cell culture media for recombinant protein expression in Chinese hamster  
581 ovary (CHO) cells: History, key components, and optimization strategies. *Biotechnol Prog*. 2018;34(6):1407-  
582 1426. doi:10.1002/btpr.2706
- 583 38. Torkashvand F, Vaziri B, Maleknia S, et al. Designed amino acid feed in improvement of production and  
584 quality targets of a therapeutic monoclonal antibody. *PLoS One*. 2015;10(10).  
585 doi:10.1371/journal.pone.0140597
- 586 39. Chaturvedi A. *Investigation of Process Conditions and Chemical Modulators on CHO-Cell Based*  
587 *Trastuzumab Production*. Rutgers, The State University of New Jersey; 2022.  
588 <https://www.proquest.com/docview/2676586036?pq-origsite=gscholar&fromopenview=true>
- 589 40. Fan Y, Jimenez Del Val I, Müller C, et al. A multi-pronged investigation into the effect of glucose starvation  
590 and culture duration on fed-batch CHO cell culture. *Biotechnol Bioeng*. 2015;112(10):2172-2184.  
591 doi:10.1002/bit.25620
- 592 41. King MW. Carbohydrates: Galactose Metabolism. In: *Integrative Medical Biochemistry Examination and*  
593 *Board Review*. ; 2014:6-9. <http://accesspharmacy.mhmedical.com/content.aspx?aid=1122103447>
- 594 42. Villacrés C, Tayi VS, Lattová E, Perreault H, Butler M. Low glucose depletes glycan precursors, reduces site  
595 occupancy and galactosylation of a monoclonal antibody in CHO cell culture. *Biotechnol J*. 2015;10(7):1051-  
596 1066. doi:10.1002/biot.201400662
- 597 43. Shi HH, Goudar CT. Recent advances in the understanding of biological implications and modulation  
598 methodologies of monoclonal antibody N-linked high mannose glycans. *Biotechnol Bioeng*.  
599 2014;111(10):1907-1919. doi:10.1002/bit.25318
- 600 44. Surve T, Gadgil M. Manganese increases high mannose glycoform on monoclonal antibody expressed in  
601 CHO when glucose is absent or limiting: Implications for use of alternate sugars. *Biotechnol Prog*.  
602 2015;31(2):460-467. doi:10.1002/btpr.2029
- 603 45. Yao G, Aron K, Borys M, Li Z, Pendse G, Lee K. A metabolomics approach to increasing Chinese hamster  
604 ovary (CHO) cell productivity. *Metabolites*. 2021;11(12). doi:10.3390/metabo11120823
- 605 46. Karst DJ, Scibona E, Serra E, et al. Modulation and modeling of monoclonal antibody N-linked glycosylation  
606 in mammalian cell perfusion reactors. *Biotechnol Bioeng*. 2017;114(9):1978-1990. doi:10.1002/bit.26315
- 607 47. Zhang L, Schwarz H, Wang M, Castan A, Hjalmarsen H, Chotteau V. Control of IgG glycosylation in CHO cell  
608 perfusion cultures by GReBA mathematical model supported by a novel targeted feed, TAFE. *Metab Eng*.  
609 2021;65(June 2020):135-145. doi:10.1016/j.ymben.2020.11.004

611 **Scheme:**

612

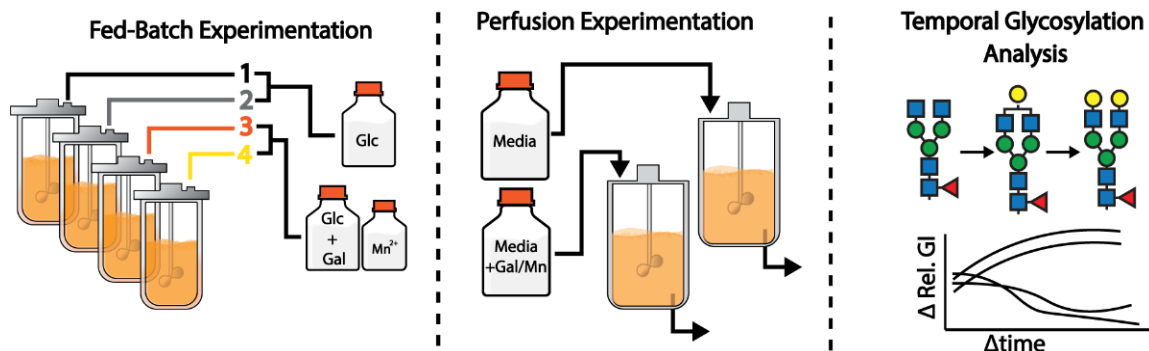

613

614 **Scheme 1: Study overview for fed-batch and perfusion-based cultures.** For the fed-batch experiments, cultures  
615 were fed either daily (every 24 h) or on alternative days (every 48 h), and with either a bolus addition of glucose  
616 (control) or glucose and galactose (supplemented). For supplemented cultures, manganese was supplemented on  
617 the first feeding day to 1  $\mu$ M. Perfusion-based experiments were perfused with either basal medium or basal  
618 medium spiked with galactose (1.8 g/L) and manganese (1  $\mu$ M). A temporal analysis of mAb glycosylation and  
619 modulation of galactosylation will be done to understand the influence of feed and feeding regimen; values will be  
620 assessed in terms of the galactosylation index (GI) and separated glycoforms.

621



622

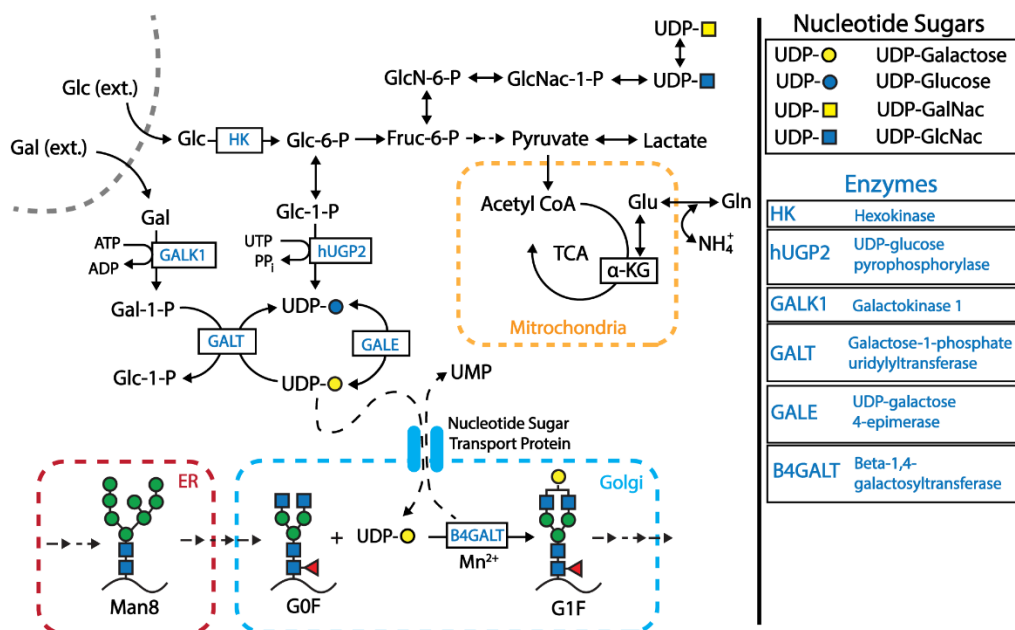

623

624 **Scheme 2: The interconnectivity of glucose and galactose metabolism.** Scheme shows a brief depiction of the  
 625 transport of glucose into glycolysis (top), the transport of galactose (middle) into the Leloir pathway, which branches  
 626 to both glycolytic and glycosylation pathways. The bottom of the scheme depicts the mAb N-glycosylation pathway  
 627 toward producing more mature glycoforms such as the G1F variant shown here.

628

629 Figures:

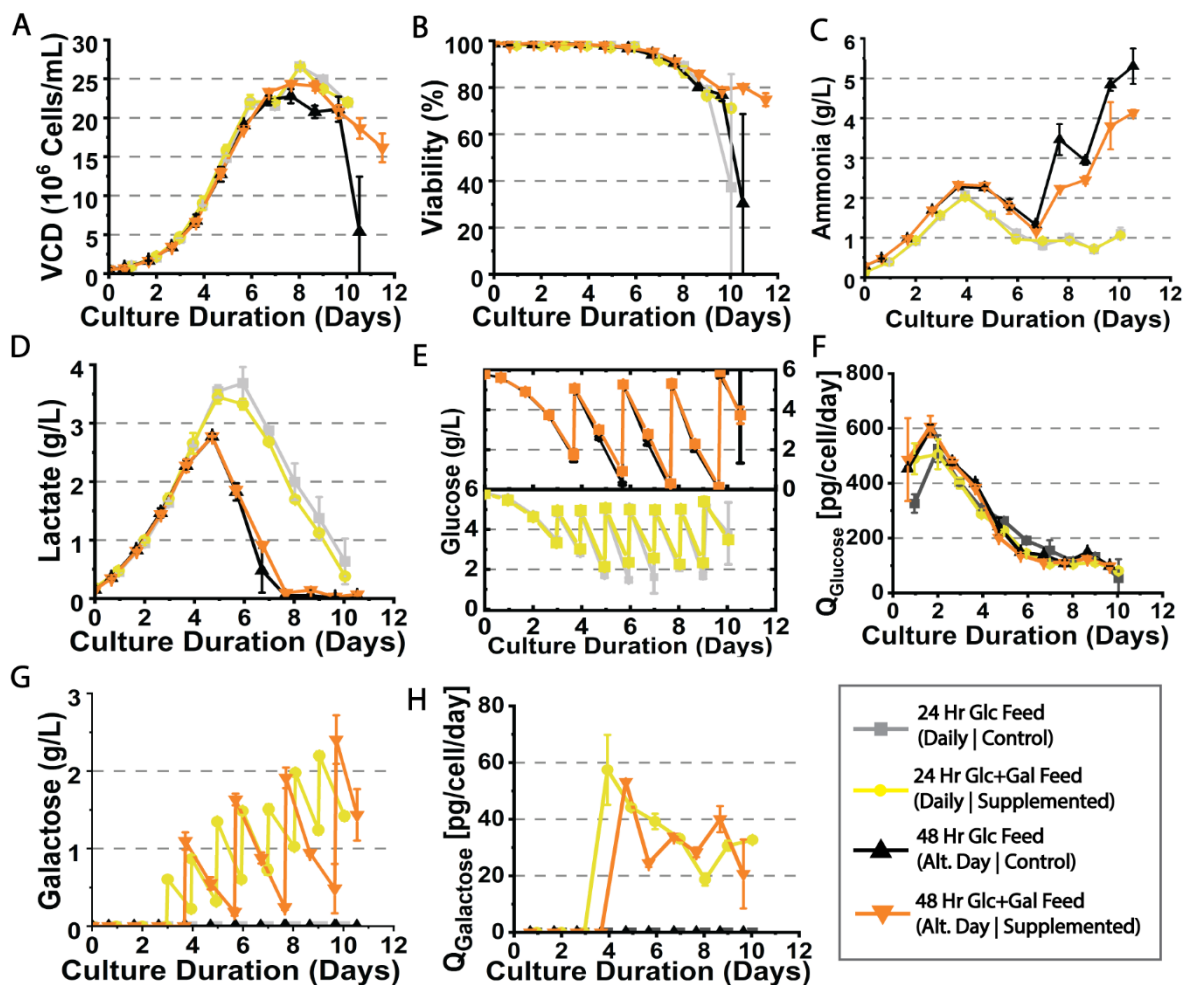

630

631 **Figure 1: Summary of fed batch culture process performance metrics.** Viable cell density (A), viability (B), ammonia  
632 content (C), lactate content (D), glucose content (E), glucose consumption rate (F), galactose content (G) and  
633 galactose consumption rate (H).

634

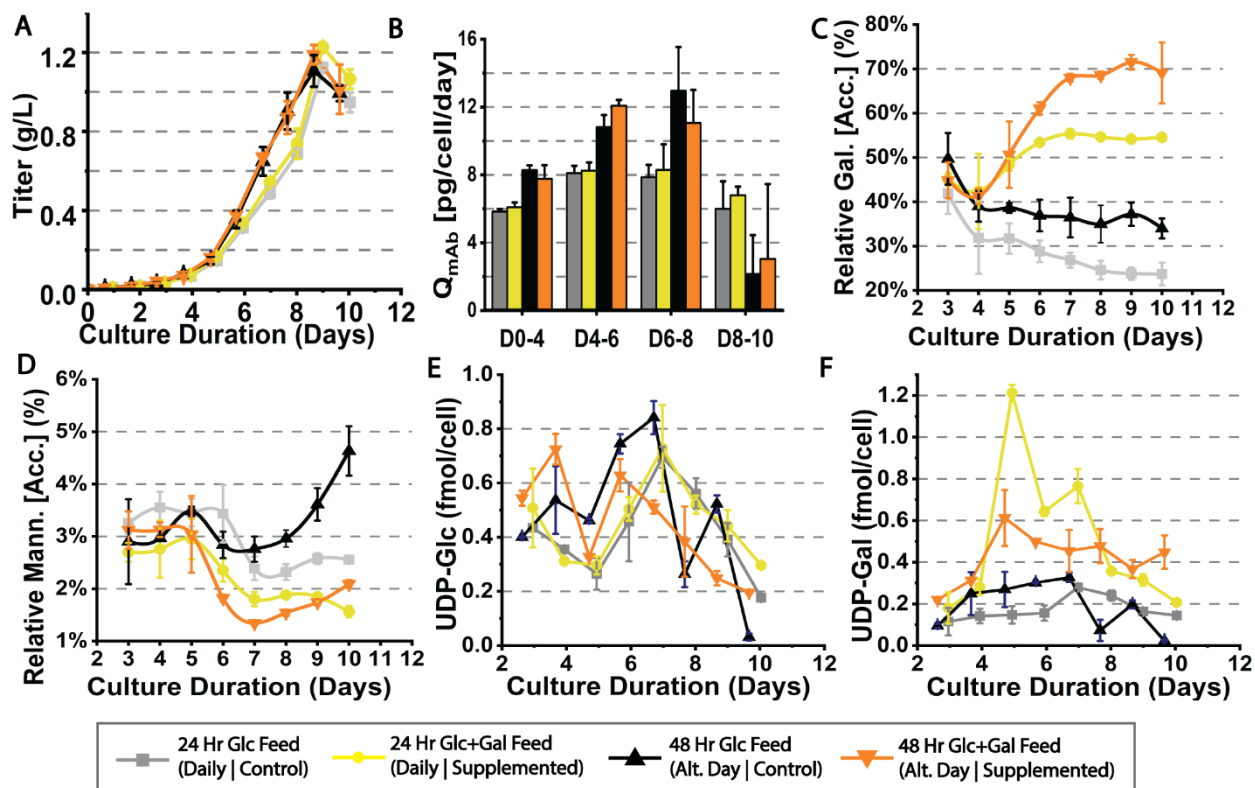

635

636 **Figure 2: Productivity, glycan indices, and glycan precursors for fed batch cultures.** MAb titer (A), mAb specific  
637 productivity (B), relative accumulated galactosylation (C), relative accumulated mannosylation (D). The intracellular  
638 nucleotide sugar pools of UDP-Glucose (E) and UDP-Galactose (F) are presented here, which are precursors for mAb  
639 glycosylation.

640

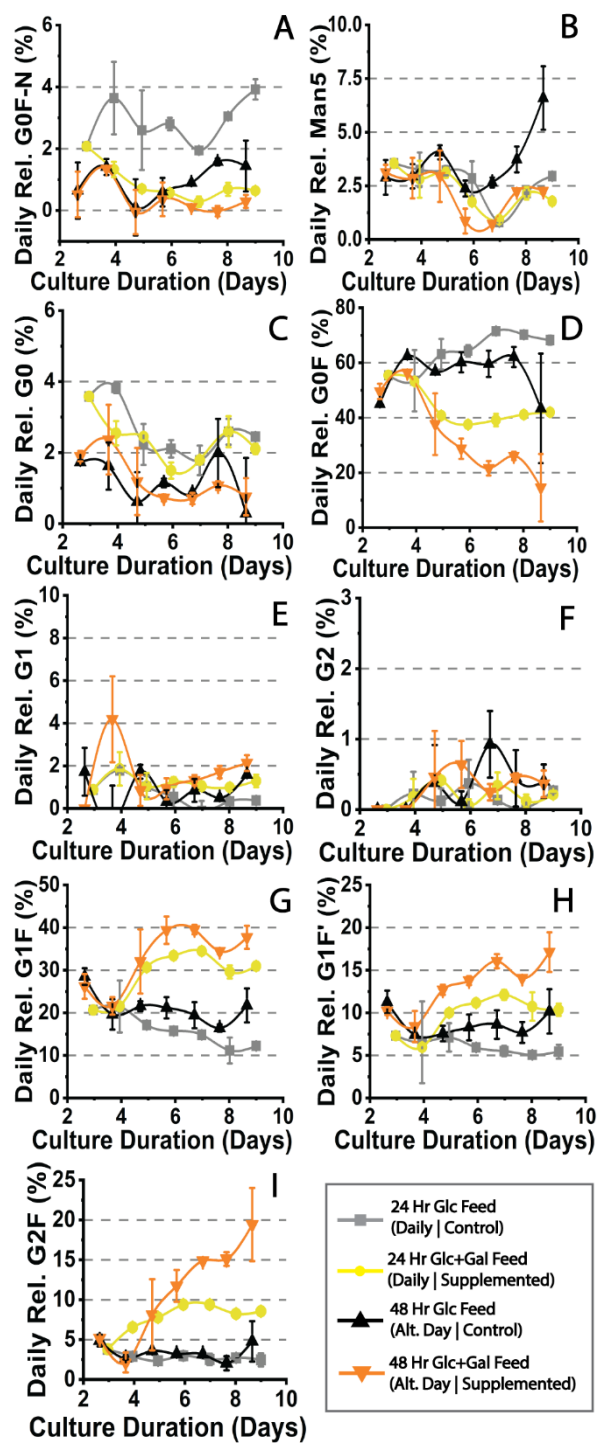

641  
642 **Figure 3: Relative daily glycoform production for fed-batch cultures.** The major mAb glycoforms are displayed here.  
643 Sialylated glycoform species are omitted as there was little to no change in their output. Their data are provided in  
644 Supplemental Figure S3.  
645

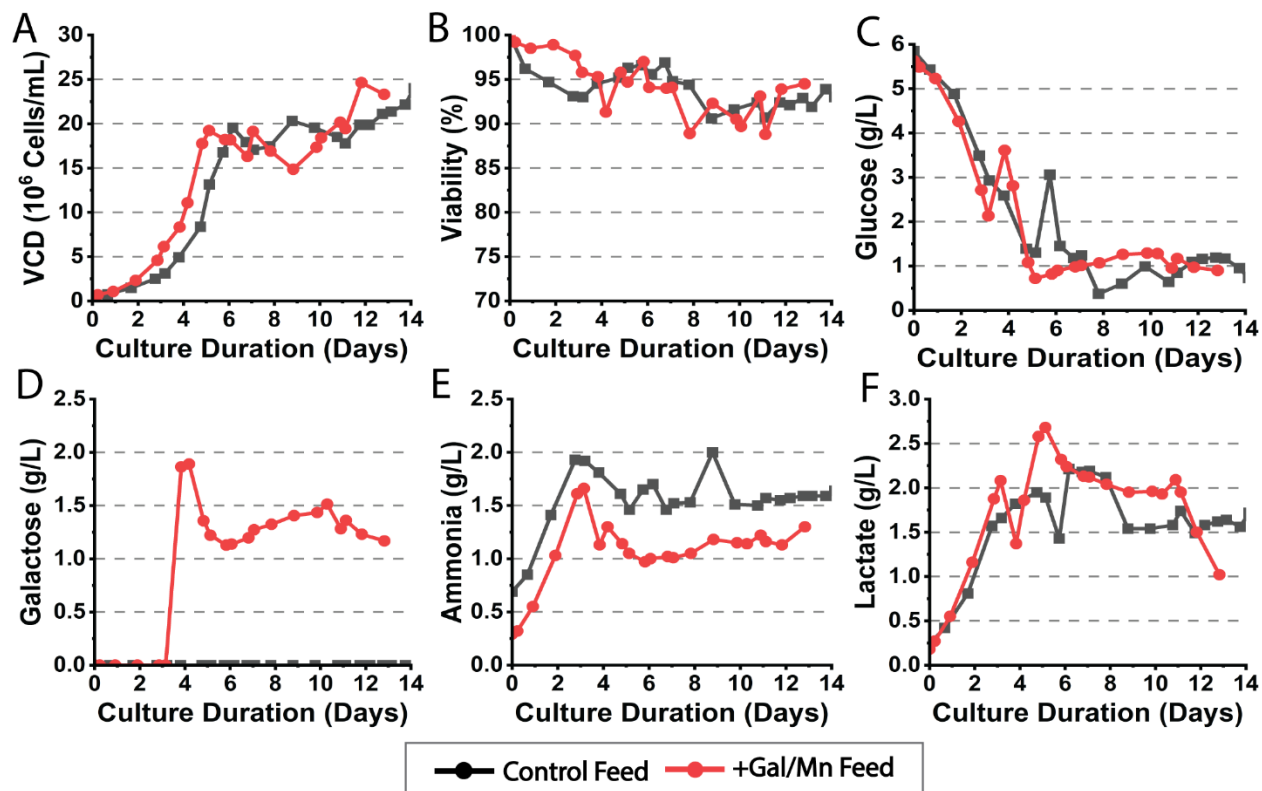

646

647 **Figure 4: Perfusion culture process conditions and metrics.** Viable cell density (A), viability (B), glucose content (C)  
648 galactose content (D), ammonia content (E) and lactate content (F).

649

650

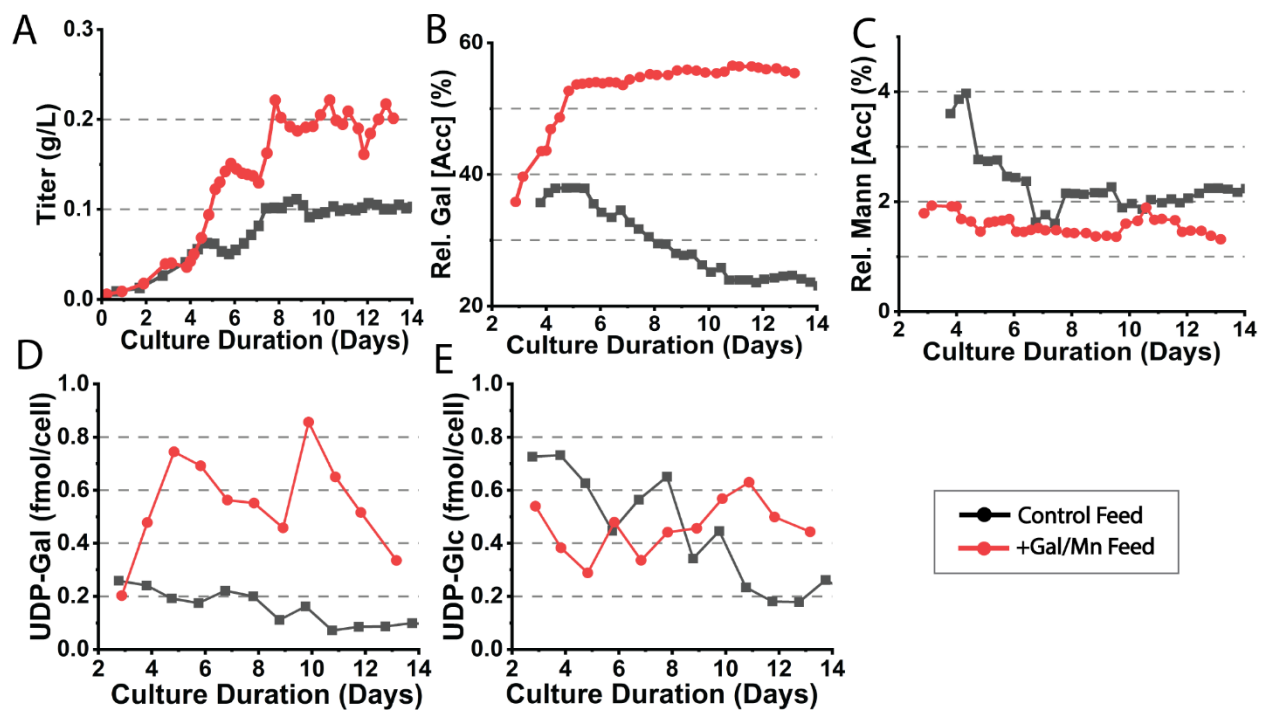

651

652 **Figure 5: Titer, glycan indices, and glycan precursors for perfusion cultures.** Daily reactor titer (A), relative  
653 galactosylation index (B) and mannosylation index (C) are shown. The cell-specific concentration of nucleotide sugar  
654 glycan precursors UDP-galactose (D) and UDP-glucose (E) are shown as well.

655

656

**Graphical Abstract:**

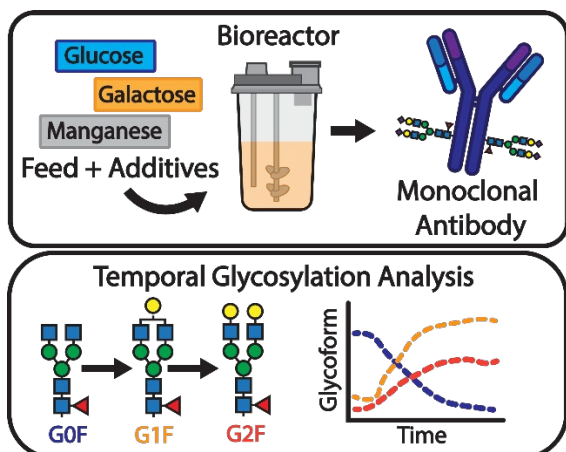

657

658 The study by Gyorgypal et al. investigates temporal effects of galactose and manganese on the glycosylation of  
659 Trastuzumab in fed-batch and perfusion bioprocessing modes, revealing the influence of feeding schedules on  
660 glycosylation patterns. The findings will aid in building process control schemes for mAb bioprocessing.
